# Supplementary figures and images for: A disease-associated Aifm1 variant induces severe myopathy in knockin mice
Source: PubMed Central journal article supplement — Mol Metab. 2018 May 8;13:10–23. doi: 10.1016/j.molmet.2018.05.002 (PMC6026322; doi:10.1016/j.molmet.2018.05.002), 2018-05-08

A

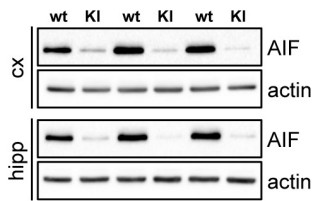

B

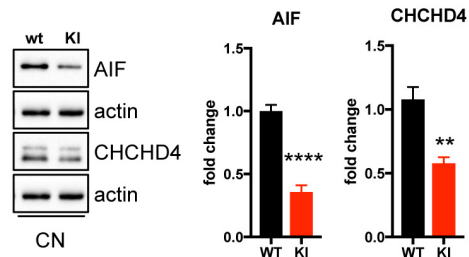

C

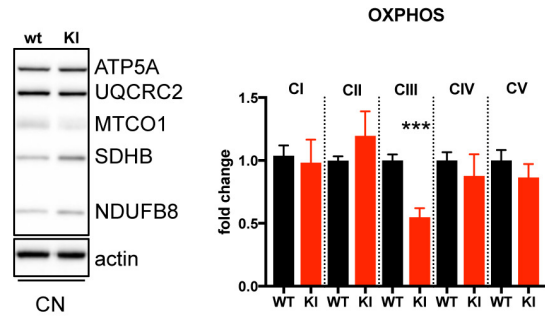

D

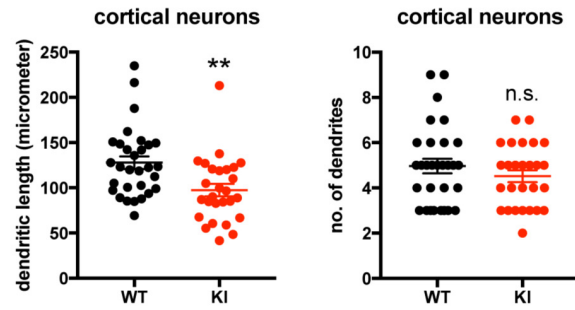

E

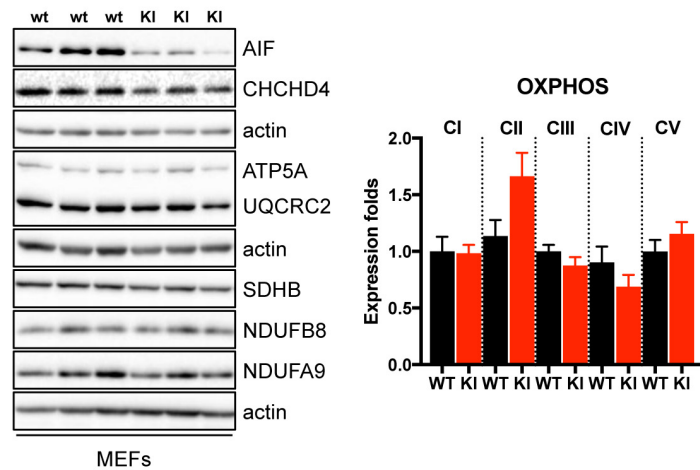

F

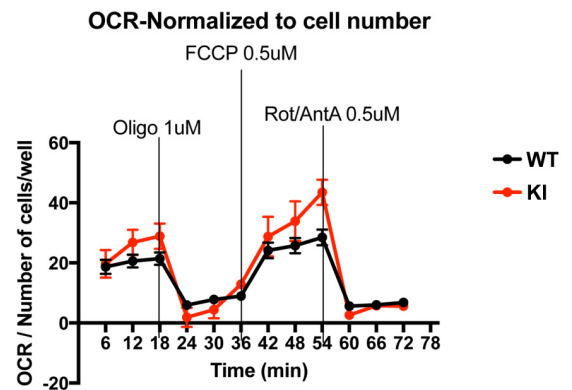

G

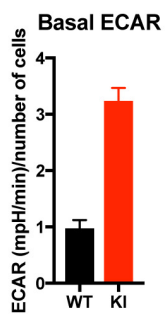

Supplement: mmc1.pdf [file mmc1.pdf]
